# Supplementary material for: MET tyrosine kinase receptor expression and amplification as prognostic biomarkers of survival in gastroesophageal adenocarcinoma
Source: PubMed Central journal article supplement — Cancer. 2016 Dec 7;123(6):1061–70. doi: 10.1002/cncr.30437 (PMC5339041; doi:10.1002/cncr.30437), 2016-12-07
Supplement: NIHMS825919-supplement-Supp_Fig_S1.pdf [file NIHMS825919-supplement-Supp_Fig_S1.pdf]

**I) Association between FISH (+/- defined by ratio  $\geq 2$  or  $< 2$ ) and covariates**

| N   | NMISS | _PCHI_   | DF_PCHI | P_PCHI         | var             |
|-----|-------|----------|---------|----------------|-----------------|
| 338 | 0     | 0.349773 | 1       | 0.554242       | Sex             |
| 338 | 0     | 0.000354 | 1       | 0.984996       | age             |
| 338 | 0     | 7.666423 | 3       | 0.053433       | race            |
| 338 | 0     | 0.217992 | 2       | 0.896734       | Histology       |
| 338 | 0     | 3.400994 | 1       | 0.065157       | Lesion Status   |
| 338 | 0     | 1.049053 | 1       | 0.305725       | Biopsy          |
| 338 | 0     | 0.003342 | 1       | 0.953899       | Curative_Surger |
| 338 | 0     | 10.0916  | 2       | <b>0.00644</b> | Diagnosis       |
| 322 | 16    | 0.459453 | 2       | 0.794751       | Stage           |
| 254 | 84    | 2.510547 | 2       | 0.284998       | HER2            |

There is a significant association observed between FISH status and Diagnosis (primary tumor anatomical location), where **esophageal primary** patients had relatively high FISH positive rate (16%) compared to that of gastric patients (3.69%).

| Table of DIAG by fishflag1                 |                                |                                     |               |
|--------------------------------------------|--------------------------------|-------------------------------------|---------------|
| DIAG(Diagnosis)                            | Fish ratio                     |                                     |               |
| Frequency<br>Percent<br>Row Pct<br>Col Pct | <2                             | >2                                  | Total         |
| gastric                                    | 287<br>84.91<br>96.31<br>89.13 | 11<br>3.25<br><b>3.69</b><br>68.75  | 298<br>88.17  |
| esophageal                                 | 26<br>7.69<br>83.87<br>8.07    | 5<br>11.48<br><b>16.13</b><br>31.25 | 31<br>9.17    |
| EGJ                                        | 9<br>2.66<br>100.00<br>2.80    | 0<br>0.00<br><b>0.00</b><br>0.00    | 9<br>2.66     |
| Total                                      | 322<br>95.27                   | 16<br>4.73                          | 338<br>100.00 |

## II) Association between MET SRM (+/- defined by SRM $\geq 400$ or $< 400$ ) and covariates

| N   | NMISS | _PCHI_   | DF_PCHI | P_PCHI         | var             |
|-----|-------|----------|---------|----------------|-----------------|
| 281 | 0     | 0.483281 | 1       | 0.48694        | Sex             |
| 281 | 0     | 0.240474 | 1       | 0.623864       | age             |
| 281 | 0     | 2.997612 | 3       | 0.391994       | race            |
| 281 | 0     | 4.178105 | 2       | 0.123804       | Histology       |
| 281 | 0     | 0.663548 | 1       | 0.41531        | LesionStatus    |
| 281 | 0     | 0.781259 | 1       | 0.376756       | Biopsy          |
| 281 | 0     | 0.009618 | 1       | 0.921877       | Curative_Surger |
| 281 | 0     | 3.644522 | 2       | 0.16166        | Diagnosis       |
| 267 | 14    | 6.239064 | 2       | <b>0.04418</b> | Stage           |
| 281 | 0     | 5.475628 | 2       | 0.064712       | HER2            |

There is significant association observed between MET SRM status and disease stage, where stage III and stage IV patients had relatively high MET SRM positive rate compared to that of stage I and II patients. Note 2 SRM positive patients had disease stage unknown and were excluded from the table. HER2-SRM and MET-SRM were trending to being associated ( $p=0.065$ ).

| Table of stgflag by metaflag               |         |       |        |
|--------------------------------------------|---------|-------|--------|
| Stage                                      | MET SRM |       |        |
| Frequency<br>Percent<br>Row Pct<br>Col Pct | <400    | >400  | Total  |
| I and II                                   | 131     | 5     | 136    |
|                                            | 49.06   | 1.87  | 50.94  |
|                                            | 96.32   | 3.68  |        |
|                                            | 53.04   | 25.00 |        |
| III                                        | 103     | 14    | 117    |
|                                            | 38.58   | 5.24  | 43.82  |
|                                            | 88.03   | 11.97 |        |
|                                            | 41.70   | 70.00 |        |
| IV                                         | 13      | 1     | 14     |
|                                            | 4.87    | 0.37  | 5.24   |
|                                            | 92.86   | 7.14  |        |
|                                            | 5.26    | 5.00  |        |
| Total                                      | 247     | 20    | 267    |
|                                            | 92.51   | 7.49  | 100.00 |
| Frequency Missing = 14                     |         |       |        |
